# Supplementary material for: Modelling the Relationship between the Nature of Work Factors and Driving Performance Mediating by Role of Fatigue
Source: MDPI journal article supplement (doi:10.3390/ijerph18136752), 2021-06-23
Supplement: s1 [file s1]

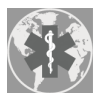

## Supplementary Information

**Table S1. Questionnaire items**

| Construct           | CODE | Item                                                                                                                    | References |
|---------------------|------|-------------------------------------------------------------------------------------------------------------------------|------------|
| Work schedule       |      |                                                                                                                         |            |
| Night shift         | NSH1 | I have no experience sleepiness while driving.                                                                          | [46, 91]   |
|                     | NSH2 | I have no experience decreased in my physical or mental functioning during the time I were awake.                       |            |
|                     | NSH3 | I have no experience sleepiness while commuting to my home after working the night shift.                               |            |
|                     | NSH4 | During night shift, I do not experience doze off while driving.                                                         |            |
| Day shift           | DSH1 | I don't have sleep problems such as snoring or obstructive sleep apnea                                                  |            |
|                     | DSH2 | During the day shift, I do not experience doze off while driving.                                                       |            |
|                     | DSH3 | During the day shift, I have no experience decreased in my physical or mental functioning during the time I were awake. |            |
|                     | DSH4 | During the day shift, I have no experience sleepiness while driving.                                                    |            |
|                     | DSH5 | I have no experience the time delay in getting to sleep at bedtime                                                      |            |
| Non-standard shifts | NNS1 | The overall amount of sleep was somewhat insufficient.                                                                  |            |
|                     | NNS2 | I have no experience sleepiness while driving.                                                                          |            |
|                     | NNS3 | I do not have a problem falling asleep at bedtime                                                                       |            |
|                     | NNS4 | I do not have a problem with waking up too early and not being able to get back to sleep                                |            |
|                     | NNS5 | During my break, I have no experience sleepiness during the time I were awake.                                          |            |
|                     | NNS6 | During my break, I do not have a problem falling asleep at bedtime.                                                     |            |
| Work activities     |      |                                                                                                                         |            |
| Job demand          | JD1  | I complete the same basic activities most of the time.                                                                  | [92, 93]   |
|                     | JD2  | I deal with problems which are difficult to solve.                                                                      |            |
|                     | JD3  | I am rarely often having spare time in my work.                                                                         |            |
|                     | JD4  | I am challenged by my job.                                                                                              |            |
|                     | JD5  | An error on my part could cause a safety incident.                                                                      |            |
|                     | JD6  | The more mental concentration required than you would like.                                                             |            |
|                     | JD7  | I have to drive for long periods (2 hours and more).                                                                    |            |
| Driving task        | DT1  | Driving is not running according to schedule                                                                            |            |
|                     | DT2  | Becoming very drowsy while driving                                                                                      |            |
|                     | DT3  | Feel boredom and monotony of the job                                                                                    |            |
|                     | DT4  | Do you drive during rush hours?                                                                                         |            |
|                     | DT5  | Being issued time-table alterations on the day of travelling                                                            |            |
| Driving performance |      |                                                                                                                         |            |
| Attention           | DA1  | Operating entertainment systems do not distract me from driving (e.g., playing radio).                                  | [94, 95]   |
|                     | DA2  | Operating navigation systems do not distract me from driving.                                                           |            |
|                     | DA3  | I sometimes push the wrong pedal                                                                                        |            |
| Reaction time       | DRT1 | My reactions are faster than they used to be (e.g., braking in an emergency).                                           |            |
|                     | DRT2 | I sometimes cannot judge my speed.                                                                                      |            |
|                     | DRT3 | I have no difficulty judging the speed of oncoming vehicles.                                                            |            |

|                      |      |                                                                                    |      |
|----------------------|------|------------------------------------------------------------------------------------|------|
| Vigilance            | DRT4 | I have no trouble judging the distance from the vehicle in front.                  | [96] |
|                      | DV1  | I have no difficulty with identifying and reading road signs.                      |      |
|                      | DV2  | I sometimes cannot hear the horns of other vehicles/sirens from emergency vehicles |      |
|                      | DV3  | Sometimes my speedometer is hard to read during the daytime.                       |      |
|                      | DV4  | Sometimes my speedometer is hard to read during the night time                     |      |
| Driving fatigue      |      |                                                                                    |      |
| Driving fa-<br>tigue | DF1  | Do you have to drive when you are tired?                                           |      |
|                      | DF2  | Do you drive when you have a minor illness like a cold?                            |      |
|                      | DF3  | Drive after not having much sleep?                                                 |      |
|                      | DF4  | Drive for longer than 2 hours without a break?                                     |      |
|                      | DF5  | Drive after working for extended periods of time?                                  |      |

**Table S2. Analysis of mediation**

| Relationship |          | Path(A)    |         | Path (B)   |         | Direct effect (c) |         | Indirect effect |       |         | Bootstrapped Confidence Interval |        | Decision          |
|--------------|----------|------------|---------|------------|---------|-------------------|---------|-----------------|-------|---------|----------------------------------|--------|-------------------|
|              |          | Path Coeff | t-value | Path Coeff | t-value | Path Coeff        | t-value | Path Coeff      | SE    | t-value | 95% LL                           | 95% UL |                   |
| <b>H6</b>    | WS-DF-DP | 0.623**    | 13.24   | 0.484**    | 7.549   | 0.490**           | 8.782   | 0.302**         | 0.056 | 5.385   | 0.192                            | 0.411  | Partial mediation |
| <b>H7</b>    | WA-DF-DP | 0.327**    | 6.532   | 0.484**    | 7.549   | -0.029            | 0.716   | 0.158**         | 0.040 | 3.957   | 0.080                            | 0.237  | Full mediation    |
